# Supplementary material for: Pheromones modulate reward responsiveness and non-associative learning in honey bees
Source: PubMed Central journal article supplement (PMC5574997; doi:10.1038/s41598-017-10113-7), 2017-08-29
Supplement: 41598_2017_10113_MOESM1_ESM.pdf [file 41598_2017_10113_MOESM1_ESM.pdf]

## Supplementary Information

### Pheromones modulate reward responsiveness and non-associative learning in honey bees

David Baracchi, Jean-Marc Devaud, Patrizia d'Ettorre & Martin Giurfa

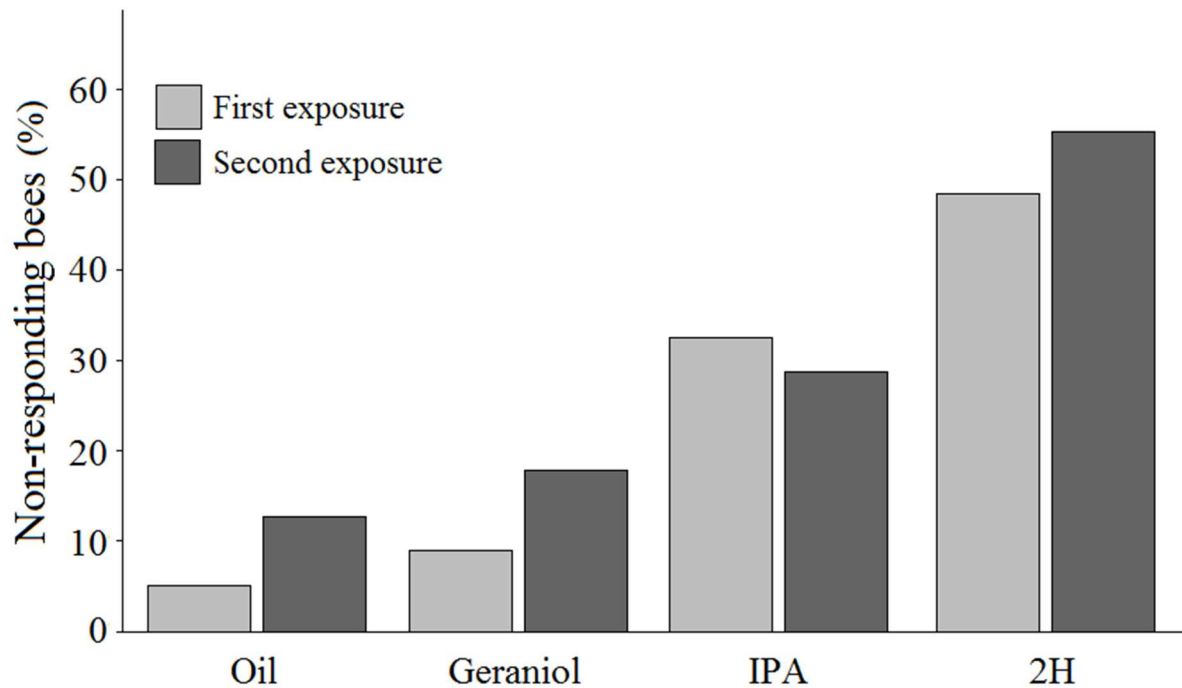

**Figure ESM1: Pheromone modulation of sucrose responsiveness remains invariable between repeated exposures.** Proportion of bees that failed to respond to any of the tested sucrose concentrations (including a 50% sucrose concentration) (*non-responding bees*) when evaluated after a first and second exposure to mineral oil ( $n = 120$ ) or to one of the three pheromone components (geraniol, IPA and 2H;  $n = 120$  for each group). In all groups, the proportion of *non-responding bees* was similar for the two successive exposures (*oil*:  $\chi^2 = 2.42$ ,  $p = 0.12$ ; *geraniol*:  $\chi^2 = 3.31$ ,  $p = 0.07$ ; *IPA*:  $\chi^2 = 0.3$ ,  $p = 0.6$ ; *2H*:  $\chi^2 = 1.1$ ,  $p = 0.3$ ).
